# Supplementary material for: Undernutrition and feeding difficulties among children with disabilities in Zambia: insights for inclusive nutrition strategies
Source: PeerJ journal article supplement (doi:10.7717/peerj.20023), 2025-09-30
Supplement: Codebook.xlsx [file Codebook.xlsx]

## Sheet: Sheet1
Variables	Explanation	Code
dob_estimated	Was date of birth estimated?	0=no; 1=yes
Isthischildinresidentialcar	Is this child in residential care?	0=no; 1=yes
Childcouldstraightenlegs	Can this child straighten legs?	0=no; 1=yes
Childcouldstand	Can this child stand?	0=no; 1=yes
Lengthmeasurementisquestionab	Is the length measurement questionable? (asked if L/Ht is an extreme value)	0=no; 1=yes
Headsizemeasurementisquestio	Is the head size measurement questionable? (asked if head circumference is an extreme value)	0=no; 1=yes
Childisstunted	Child is stunted based on legnth/height for age	0=no; 1=yes
MUACindicateswasting	Child has wasting based on MUAC	0=no; 1=yes
Weightforheightindicateswast	Child has wasting based on weight for length/height	0=no; 1=yes
BMIindicatesunderweight	Child is underweight based on BMI for age	0=no; 1=yes
Weightforageindicatesunderwe	Child is underweight based on weight for age	0=no; 1=yes
growth_check	Growth data checked	0=no; 1=yes
Childhadinfection	Child had an infection (fever, malaria, etc.) (asked before beginning anemia screening)	0=no; 1=yes
anemia_check	Anemia data checked	0=no; 1=yes
develop_disability	Child has a developmental disability	0=no; 1=yes
other_needs	Child has other special health care needs	0=no; 1=yes
WAZ2	Underweight (yes/no) based on weight for age	0=no; 1=yes
LHAZ2	Stunted (yes/no) based on length/heigth for age	0=no; 1=yes
WLHZ2	Wasted (yes/no) based on weight for length/height	0=no; 1=yes
under_five	Child under 5 years old	0=no; 1=yes
over_6mo	Child is older than 6 months old	0=no; 1=yes
muac2	Child is wasted (yes/no) based on MUAC	0=no; 1=yes
anemia2	Child is anemic (yes/no)	0=no; 1=yes
muacz2	Child is wasted (yes/no) based on MUAC for age z-scores	0=no; 1=yes
other_dd	Child has developmental disabilities other than CP and Down syndrome	0=no; 1=yes
other_hcn	Child has special healthcare needs other than developmental disabilities	0=no; 1=yes
meal_assistance	Is level of assistance provided during mealtime age-appropriate?	0=no; 1=yes
feeding_tool	Are feeding tools used during mealtime age-appropriate?	0=no; 1=yes
texture	Are food textures offered during mealtime age-appropriate?	0=no; 1=yes
mealtime_duration	Is mealtime duration age-appropriate?	0=no; 1=yes
feeding_difficulty	Is the child at risk for feeding difficulties?	0=no; 1=yes
autism	Does the child have autism spectrum disorder?	0=no; 1=yes
cp	Does the child have cerebral palsy?	0=no; 1=yes
cleft_lip	Does the child have a cleft lip/palate?	0=no; 1=yes
cog_impairment	Does the child have a cognitive impairement?	0=no; 1=yes
hiv	Does the child have HIV/AIDS?	0=no; 1=yes
down_syn	Does the child have Down syndrome?	0=no; 1=yes
heart	Does the child have a heart disease/defect?	0=no; 1=yes
hydroceph	Does the child have hydrocephalus?	0=no; 1=yes
seizure	Does the child have seizure disorder/epilepsy?	0=no; 1=yes
vis_impairment	Does the child have a visual impairment?	0=no; 1=yes
lbw	Was the child low birth weight (< 2.5 kg)?	0=no; 1=yes
premature	Was the child born prematurely?	0=no; 1=yes
other	Does the child have other conditions?	0=no; 1=yes
total_dx	Total number of conditions [not a categorical variable]	Tally of the number of conditions from rows 33-45
feeding_assessed	Does child have a feeding assessment?	0=no; 1=yes
weight_present	Does child have a weight measurement?	0=no; 1=yes
hgt_lgt_present	Does child have a length/height measurement?	0=no; 1=yes
muac_present	Does child have a MUAC measurement?	0=no; 1=yes
anthro_present	Does child have anthropometric measurement?	0=no; 1=yes
